# Supplementary material
Source: publisher figshare collection journal article supplement (https://diabetesjournals.figshare.com/articles/dataset/_/16903927)
Supplement: Supplementary file 3 [file 1]

## Checklist for Reporting Human Islet Preparations Used in Research

Adapted from Hart NJ, Powers AC (2018) Progress, challenges, and suggestions for using human islets to understand islet biology and human diabetes. Diabetologia <https://doi.org/10.1007/s00125-018-4772-2>.

|                                                                                                                                                                                                                                                                |                                               |
|----------------------------------------------------------------------------------------------------------------------------------------------------------------------------------------------------------------------------------------------------------------|-----------------------------------------------|
| <b>Manuscript DOI:</b> <a href="https://doi.org/10.2337/[insert manuscript submission number]">https://doi.org/10.2337/[insert manuscript submission number]</a> (Example, <a href="https://doi.org/10.2337/db18-1234">https://doi.org/10.2337/db18-1234</a> ) |                                               |
| <b>Title:</b> Human islet microRNA-200c is elevated in type 2 diabetes and targets the transcription factor ETV5 to reduce insulin secretion                                                                                                                   |                                               |
| <b>Author list:</b> Jones K. Ofori, Alexandros Karagiannopoulos, Mototsugu Nagao, Efraim Westholm, Shaima Ramadan, Anna Wendt, Jonathan LS Esguerra and Lena Eliasson                                                                                          |                                               |
| <b>Corresponding author:</b> Lena Eliasson                                                                                                                                                                                                                     | <b>Email address:</b> lena.eliasson@med.lu.se |

| Islet preparation              | 1    | 2    | 3    | 4    | 5    | 6    | 7    | 8 <sup>a</sup> |
|--------------------------------|------|------|------|------|------|------|------|----------------|
| MANDATORY INFORMATION          |      |      |      |      |      |      |      |                |
| Unique identifier              | ND_1 | ND_2 | ND_3 | ND_4 | ND_5 | ND_6 | ND_7 | ND_8           |
| Donor age (years)              | 59   | 70   | 54   | 49   | 63   | 49   | 69   | 57             |
| Donor sex (M/F)                | M    | F    | M    | F    | M    | F    | M    | F              |
| Donor BMI (kg/m <sup>2</sup> ) | 23.5 | 31.1 | 28.4 | 33.4 | 30.5 | 27.8 | 26.1 | 24.7           |

|                                                                             |                                             |                                             |                                             |                                             |                                             |                                             |                                             |                                             |
|-----------------------------------------------------------------------------|---------------------------------------------|---------------------------------------------|---------------------------------------------|---------------------------------------------|---------------------------------------------|---------------------------------------------|---------------------------------------------|---------------------------------------------|
| Donor HbA <sub>1c</sub> or other measure of blood glucose control           | 5.9                                         | 5.8                                         | 5.8                                         | 5.8                                         | 5.7                                         | 5.7                                         | 5.6                                         | 5.6                                         |
| Origin/source of islets <sup>b</sup>                                        | Nordic Network for Islet Transplantation    |
| Islet isolation centre                                                      | Islet isolation facility in Uppsala, Sweden |
| Donor history of diabetes? Yes/No                                           | No                                          |
| <b>If Yes, complete the next two lines if this information is available</b> |                                             |                                             |                                             |                                             |                                             |                                             |                                             |                                             |
| Diabetes duration (years)                                                   |                                             |                                             |                                             |                                             |                                             |                                             |                                             |                                             |
| Glucose-lowering therapy at time of death <sup>c</sup>                      |                                             |                                             |                                             |                                             |                                             |                                             |                                             |                                             |

| RECOMMENDED INFORMATION |  |  |  |  |  |  |  |  |
|-------------------------|--|--|--|--|--|--|--|--|
| Donor cause of death    |  |  |  |  |  |  |  |  |
| Warm ischaemia time (h) |  |  |  |  |  |  |  |  |
| Cold ischaemia time (h) |  |  |  |  |  |  |  |  |

|                                                                                   |     |     |     |     |     |     |     |     |
|-----------------------------------------------------------------------------------|-----|-----|-----|-----|-----|-----|-----|-----|
| Estimated purity (%)                                                              |     |     |     |     |     |     |     |     |
| Estimated viability (%)                                                           |     |     |     |     |     |     |     |     |
| Total culture time (h) <sup>d</sup>                                               |     |     |     |     |     |     |     |     |
| Glucose-stimulated insulin secretion or other functional measurement <sup>e</sup> |     |     |     |     |     |     |     |     |
| Handpicked to purity?<br>Yes/No                                                   | Yes |
| Additional notes                                                                  |     |     |     |     |     |     |     |     |

<sup>a</sup>If you have used more than eight islet preparations, please complete additional forms as necessary

<sup>b</sup>For example, IIDP, ECIT, Alberta IsletCore

<sup>c</sup>Please specify the therapy/therapies

<sup>d</sup>Time of islet culture at the isolation centre, during shipment and at the receiving laboratory

<sup>e</sup>Please specify the test and the results
