# Supplementary material
Source: publisher figshare collection journal article supplement (https://diabetesjournals.figshare.com/articles/dataset/_/16903927)
Supplement: Supplementary file 5 [file 1]

## **Supplementary information**

**Title: Human islet microRNA-200c is elevated in type 2 diabetes and targets the transcription factor ETV5 to reduce insulin secretion**

**Jones K. Ofori, Alexandros Karagiannopoulos, Mototsugu Nagao, Efraim Westholm, Shaima Ramadan, Anna Wendt, Jonathan LS Esguerra and Lena Eliasson**

## Supplementary Figures

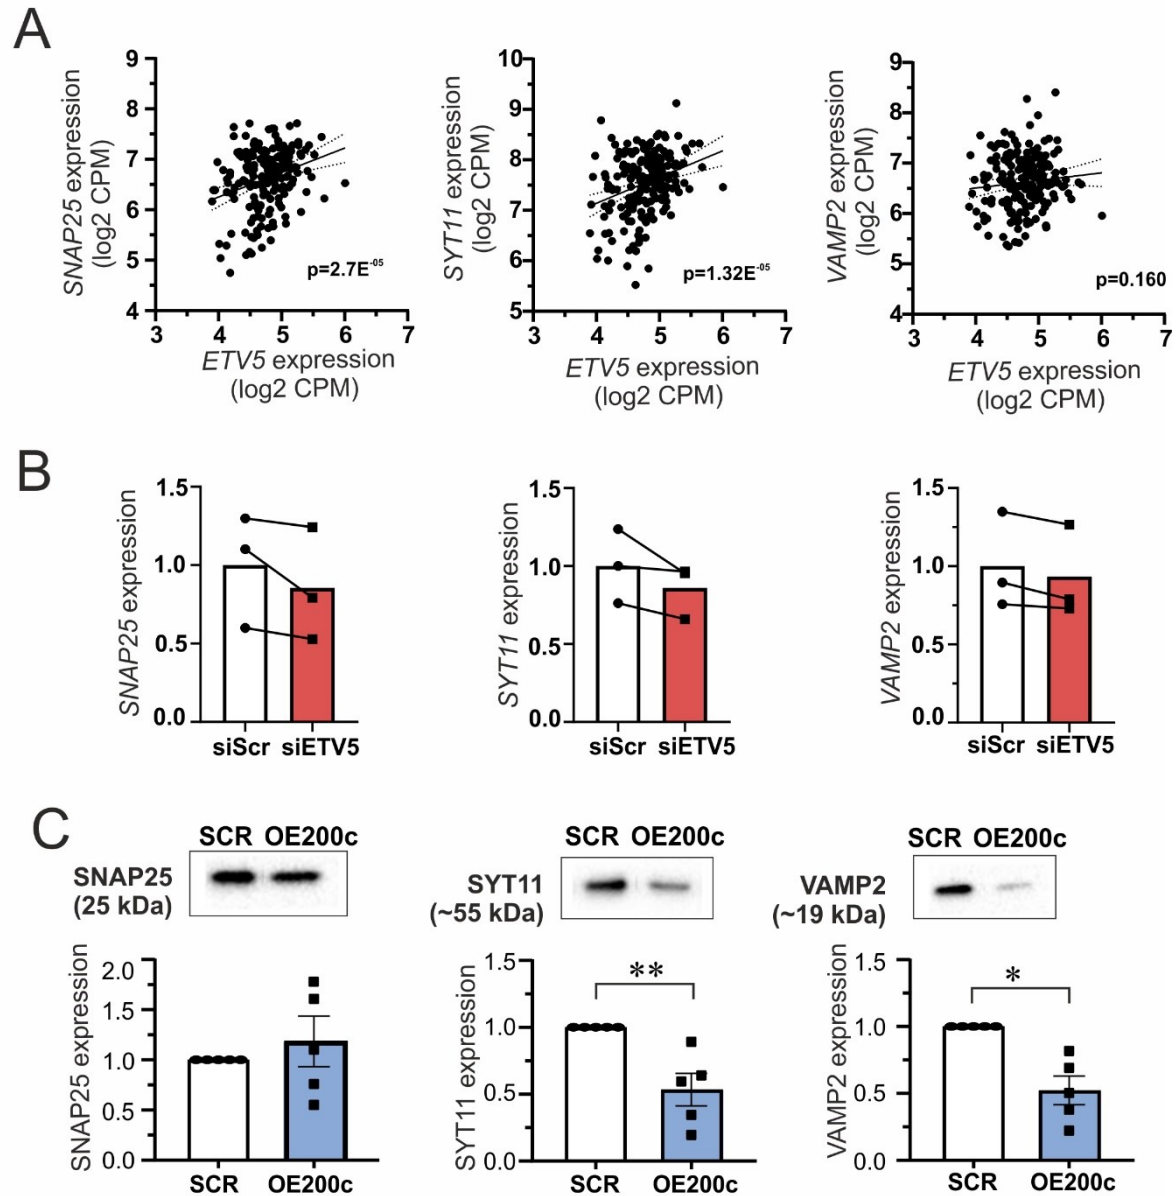

**Supplementary Figure 1. Potential regulation of *SNAP25*, *SYT11* and *VAMP2* by *ETV5* and miR-200c.**

**A.** Pearson correlation between *ETV5* expression and expression of *SNAP25*, *SYT11* and *VAMP2* in human islets (N=185). P-values are given in the figure. **B.** Expression of *SNAP25*, *SYT11* and *VAMP2* in human islets after knock-down of *ETV5* (siETV5) compared to control. (N=3) **C.** Western blot analysis of *SNAP25*, *SYT11* and *VAMP2* in SCR control OE200 in EndoC- $\beta$ H1. Data are presented as mean of N = 5 biological replicates presented as mean  $\pm$  SEM, \* $p < 0.05$ , \*\* $p < 0.01$  using Student's t-test.

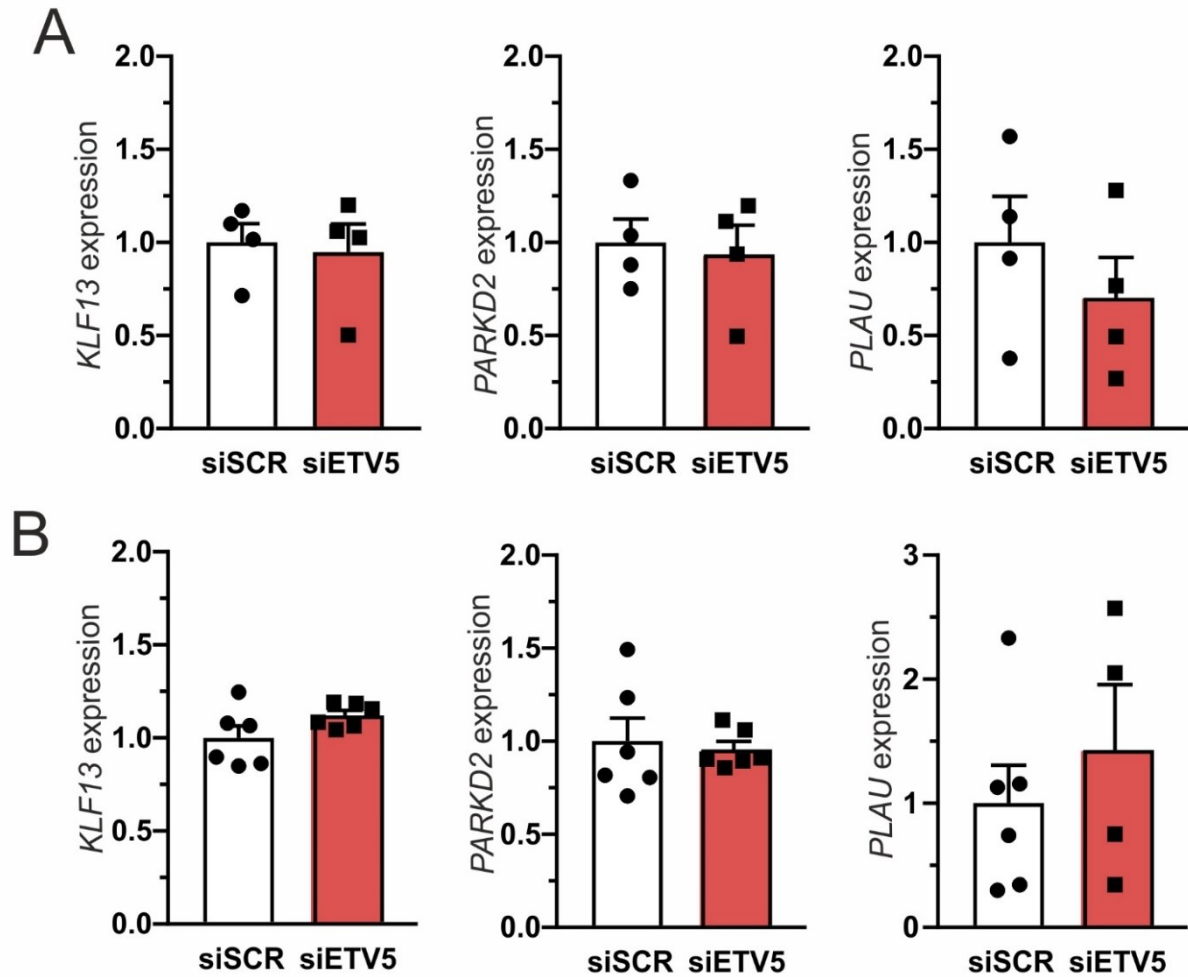

**Supplementary Figure 2. Expression of genes potentially regulated by ETV5.**

Expression of *KLF13*, *PARKD2* and *PLAU* measured by qPCR after knock-down of ETV5 (siETV5) in **A**. human islets (N=4) and **B**. EndoC-βH1 beta cells (N=6). Data are presented as mean ± SEM.

## Supplementary Tables

### Supplementary Table 1. Donor characteristics for experiments with human pancreatic islets.

ND-non-diabetes (HbA1c<6.0), IGT-impaired glucose tolerance (HbA1c between 6% and 6.5%), T2D-type 2 diabetes ( diagnosed T2D and HbA1c>6.5) , nD-T2D (undiagnosed and HbA1c>6.5). \* Data are from REF# 18; The original data-set contained in total 195 donors, and here we have filtered the data and removed those without condition yielding in total 185 donors in the analyses performed.

| Group                                 | n   | Gender<br>(Male / Female) | Age<br>(years old) | BMI<br>(kg/m <sup>2</sup> ) | HbA1c<br>(%, mmol/mol)          | Figure                               |
|---------------------------------------|-----|---------------------------|--------------------|-----------------------------|---------------------------------|--------------------------------------|
| Figure 1A, Figure 5C and ESM Table 2  |     |                           |                    |                             |                                 |                                      |
| ND                                    | 25  | 15 / 10                   | 56.4± 2.0          | 26.1 ± 0.6                  | 5.43±0.08,<br>35.9±0.9 (n=20)   | Fig 1A,<br>Fig 5C,<br>ESM<br>Table 2 |
| IGT                                   | 8   | 2/6                       | 58.0±2.3           | 26.4±1.5                    | 6.08±0.03,<br>42.8±0.3          | Fig 5C,<br>ESM<br>Table 2            |
| T2D                                   | 9   | 4/ 5                      | 56.8 ± 2.7         | 28.5 ± 1.3                  | 6.55 ± 0.16,<br>48.6±1.8 (n=8)  | Fig 1A,<br>Fig 5C,<br>ESM<br>Table 2 |
| nD-T2D                                | 5   | 2/3                       | 62.8± 3.7          | 27.4 ± 0.7                  | 7.24±0.37,<br>56.4±3.5          | Fig 5C,<br>ESM<br>Table 2            |
| *Fig 2B-C, ESM Table 3 and ESM Fig 1A |     |                           |                    |                             |                                 |                                      |
| ND                                    | 120 | 74/46                     | 57.86 ± 0.96       | 25.97 ± 0.33                | 5.5 ± 0.03,<br>37 ± 0.3 (n=101) | Fig 2B-C<br>and ESM<br>Table 3       |
| IGT                                   | 33  | 21/12                     | 60.36 ± 1.11       | 26.56 ± 0.69                | 6.1 ± 0.02<br>43 ± 0.2          | ESM<br>Table 3                       |

|                                                                      |    |       |            |             |                             |                                                               |
|----------------------------------------------------------------------|----|-------|------------|-------------|-----------------------------|---------------------------------------------------------------|
| T2D                                                                  | 32 | 21/11 | 61 ± 1.79  | 27.9 ± 0.78 | 6.8 ± 0.15<br>51±0.7 (n=31) | Fig 2B-C<br>and ESM<br>Table 3                                |
| Figure 4A-B, Figure 5A, ESM Figure 1B, ESM Figure 2A and ESM Table 4 |    |       |            |             |                             |                                                               |
| ND                                                                   | 4  | 3 / 1 | 57.7 ± 7.5 | 29.4 ± 1.4  | 5.47 ± 0.34, 36.2 ± 3.6     | Figure 4A-B,<br>Figure 5A,<br>ESM Figure 1B,<br>ESM Figure 2A |
| Figure 6                                                             |    |       |            |             |                             |                                                               |
| T2D                                                                  | 3  | 2 / 1 | 73.0 ± 5.0 | 26.8 ± 0.5  | 5.80 ± 0.12, 40.0 ± 1.2     | Figure 6A-B                                                   |

**Supplementary Table 2 Pearson correlation analysis of potential miR-200c targets.**

Pearson correlation analysis between hsa-miR-200c and RNA-seq expression data of potential miR-200c from Target scan. The table only shows genes with negative correlation with has-miR-200c. P<0.05 was regarded as significant. R=Pearson correlation coefficient. P=p-value.

| No | Target          | hsa-miR-200c |             |
|----|-----------------|--------------|-------------|
|    |                 | R            | P           |
| 1  | <i>ETV5</i>     | -0,470322217 | 0,001113555 |
| 2  | <i>TMEFF2</i>   | -0,441209012 | 0,002415227 |
| 3  | <i>FUBP1</i>    | -0,40510533  | 0,005771305 |
| 4  | <i>FUBP3</i>    | -0,395768631 | 0,007122931 |
| 5  | <i>KHDRBS1</i>  | -0,395401657 | 0,00718123  |
| 6  | <i>ZNF362</i>   | -0,383514058 | 0,009306834 |
| 7  | <i>DCAF16</i>   | -0,382995985 | 0,009410636 |
| 8  | <i>PALM2</i>    | -0,379179803 | 0,010206393 |
| 9  | <i>GATSL2</i>   | -0,378874754 | 0,010272425 |
| 10 | <i>SNX30</i>    | -0,368343524 | 0,012788153 |
| 11 | <i>PTDSS1</i>   | -0,361195282 | 0,01478055  |
| 12 | <i>KLF9</i>     | -0,360484414 | 0,014992378 |
| 13 | <i>ARHGAP20</i> | -0,359297891 | 0,015351688 |
| 14 | <i>ZEB2</i>     | -0,355872753 | 0,016430182 |
| 15 | <i>HSPA9</i>    | -0,350151716 | 0,01837467  |
| 16 | <i>WASF3</i>    | -0,347942836 | 0,019175722 |
| 17 | <i>BAG5</i>     | -0,347487479 | 0,019344466 |
| 18 | <i>NUAK1</i>    | -0,346847313 | 0,019583811 |
| 19 | <i>FBXO33</i>   | -0,34584062  | 0,019965235 |
| 20 | <i>ETS1</i>     | -0,34379944  | 0,020757835 |
| 21 | <i>RND3</i>     | -0,342038518 | 0,021462706 |
| 22 | <i>C5orf51</i>  | -0,341407243 | 0,021720242 |
| 23 | <i>ARL5A</i>    | -0,339510298 | 0,022509779 |
| 24 | <i>TCF4</i>     | -0,336575974 | 0,023778402 |

|    |                |              |             |
|----|----------------|--------------|-------------|
| 25 | <i>PLEKHM3</i> | -0,336404819 | 0,023854208 |
| 26 | <i>ETF1</i>    | -0,331203975 | 0,026256006 |
| 27 | <i>TMX4</i>    | -0,330028011 | 0,026826135 |
| 28 | <i>PI4KB</i>   | -0,326176362 | 0,028766144 |
| 29 | <i>TTC13</i>   | -0,325364636 | 0,029189515 |
| 30 | <i>RTF1</i>    | -0,324635711 | 0,029574094 |
| 31 | <i>GATAD2B</i> | -0,323348795 | 0,030263326 |
| 32 | <i>LRIG1</i>   | -0,322923782 | 0,030493853 |
| 33 | <i>SOCS6</i>   | -0,322289614 | 0,030840528 |
| 34 | <i>ATXN1L</i>  | -0,320094379 | 0,032065874 |
| 35 | <i>PPP6C</i>   | -0,318751527 | 0,032835075 |
| 36 | <i>DNAJB5</i>  | -0,316824989 | 0,033965174 |
| 37 | <i>PPP2R5C</i> | -0,313363849 | 0,036075978 |
| 38 | <i>ADAMTS3</i> | -0,312754381 | 0,036458606 |
| 39 | <i>DACT1</i>   | -0,311799423 | 0,037064836 |
| 40 | <i>CDH11</i>   | -0,311367261 | 0,037341891 |
| 41 | <i>MIEF1</i>   | -0,307190282 | 0,04010834  |
| 42 | <i>MARCH8</i>  | -0,30707131  | 0,040189526 |
| 43 | <i>RANBP9</i>  | -0,307065874 | 0,040193239 |
| 44 | <i>HNRNPK</i>  | -0,306152636 | 0,040820969 |
| 45 | <i>CHRD1</i>   | -0,305047885 | 0,041591025 |
| 46 | <i>PRKAR1A</i> | -0,299812709 | 0,045403082 |
| 47 | <i>BHLHE41</i> | -0,299476681 | 0,045657155 |
| 48 | <i>NEGR1</i>   | -0,297620634 | 0,047081417 |
| 49 | <i>ERG</i>     | -0,296769312 | 0,04774664  |
| 50 | <i>CDYL</i>    | -0,29413883  | 0,049850382 |
| 51 | <i>FAM168B</i> | -0,292666693 | 0,05106006  |
| 52 | <i>POU6F1</i>  | -0,289517148 | 0,05372774  |
| 53 | <i>FRS2</i>    | -0,288882127 | 0,054278964 |
| 54 | <i>SLC23A2</i> | -0,287801221 | 0,055227695 |
| 55 | <i>CDK12</i>   | -0,286780128 | 0,056136128 |
| 56 | <i>SCAMP5</i>  | -0,285770048 | 0,057046532 |
| 57 | <i>SEPHS1</i>  | -0,28469957  | 0,058024264 |
| 58 | <i>SESN3</i>   | -0,28241524  | 0,060155595 |
| 59 | <i>HS2ST1</i>  | -0,280860958 | 0,06164123  |
| 60 | <i>KCNB1</i>   | -0,280712392 | 0,061784755 |
| 61 | <i>GLI3</i>    | -0,27954537  | 0,062921477 |
| 62 | <i>PFN2</i>    | -0,279064527 | 0,063394659 |
| 63 | <i>RAC1</i>    | -0,277617241 | 0,06483602  |
| 64 | <i>ASTN1</i>   | -0,276813974 | 0,065647181 |
| 65 | <i>ACTR1A</i>  | -0,276493306 | 0,065973245 |
| 66 | <i>PARM1</i>   | -0,276309639 | 0,066160581 |
| 67 | <i>SERINC1</i> | -0,275819229 | 0,066662861 |
| 68 | <i>ZFPM2</i>   | -0,275727012 | 0,066757648 |
| 69 | <i>SLITRK1</i> | -0,2746452   | 0,067877614 |

|     |                    |              |             |
|-----|--------------------|--------------|-------------|
| 70  | <i>KIF13A</i>      | -0,274263217 | 0,068276611 |
| 71  | <i>DEK</i>         | -0,274095626 | 0,068452253 |
| 72  | <i>GNAQ</i>        | -0,273438175 | 0,069144748 |
| 73  | <i>FAM217B</i>     | -0,270595226 | 0,072203357 |
| 74  | <i>CDK17</i>       | -0,268521795 | 0,074500714 |
| 75  | <i>UBQLN1</i>      | -0,267329083 | 0,075848102 |
| 76  | <i>ZNF711</i>      | -0,26396865  | 0,079747621 |
| 77  | <i>ATP6V0A2</i>    | -0,262059062 | 0,082032573 |
| 78  | <i>ANKRD28</i>     | -0,259009061 | 0,08578796  |
| 79  | <i>ARCN1</i>       | -0,25733447  | 0,087906077 |
| 80  | <i>PTPN11</i>      | -0,256843932 | 0,088534178 |
| 81  | <i>FLI1</i>        | -0,255010001 | 0,090913351 |
| 82  | <i>FBXW11</i>      | -0,253454583 | 0,092969819 |
| 83  | <i>E2F3</i>        | -0,25218752  | 0,094671507 |
| 84  | <i>COMMD3-BMI1</i> | -0,25139875  | 0,095742935 |
| 85  | <i>COPS8</i>       | -0,250501908 | 0,096972511 |
| 86  | <i>PAM</i>         | -0,247787904 | 0,100767695 |
| 87  | <i>CNOT7</i>       | -0,246736824 | 0,102267781 |
| 88  | <i>TBK1</i>        | -0,246466732 | 0,102656008 |
| 89  | <i>DENND5B</i>     | -0,245461493 | 0,104110863 |
| 90  | <i>XIAP</i>        | -0,244845167 | 0,105010635 |
| 91  | <i>XKR4</i>        | -0,24480238  | 0,10507332  |
| 92  | <i>ERI3</i>        | -0,244355875 | 0,105729181 |
| 93  | <i>GRAP2</i>       | -0,241624507 | 0,109809622 |
| 94  | <i>CRTAP</i>       | -0,239919488 | 0,112416964 |
| 95  | <i>CDC40</i>       | -0,239750542 | 0,112677862 |
| 96  | <i>ZCCHC24</i>     | -0,239073393 | 0,113728178 |
| 97  | <i>DCUN1D1</i>     | -0,238151391 | 0,115170218 |
| 98  | <i>SURF4</i>       | -0,237497577 | 0,116201179 |
| 99  | <i>KCMF1</i>       | -0,236309936 | 0,118091773 |
| 100 | <i>GABBR2</i>      | -0,236089584 | 0,118445096 |
| 101 | <i>UBE2D1</i>      | -0,235450762 | 0,119473927 |
| 102 | <i>YME1L1</i>      | -0,235299349 | 0,119718766 |
| 103 | <i>SMIM5</i>       | -0,233870314 | 0,122048271 |
| 104 | <i>DYRK2</i>       | -0,233291119 | 0,123002103 |
| 105 | <i>NAA50</i>       | -0,232845235 | 0,123740212 |
| 106 | <i>PJA2</i>        | -0,232813608 | 0,123792692 |
| 107 | <i>SLIT2</i>       | -0,232135298 | 0,124922304 |
| 108 | <i>ARIH2</i>       | -0,231374609 | 0,126198305 |
| 109 | <i>RPS6KA3</i>     | -0,231279765 | 0,126358083 |
| 110 | <i>LHFP</i>        | -0,230868694 | 0,127052345 |
| 111 | <i>PPP6R3</i>      | -0,230524021 | 0,127636672 |
| 112 | <i>COPS2</i>       | -0,230449936 | 0,127762531 |
| 113 | <i>SECISBP2L</i>   | -0,230447821 | 0,127766125 |

|     |                |              |             |
|-----|----------------|--------------|-------------|
| 114 | <i>ATXN1</i>   | -0,230096119 | 0,128364899 |
| 115 | <i>FRMD6</i>   | -0,230002582 | 0,1285245   |
| 116 | <i>ZNF148</i>  | -0,228971932 | 0,130292941 |
| 117 | <i>USP6NL</i>  | -0,228618995 | 0,130902695 |
| 118 | <i>FSTL1</i>   | -0,228020278 | 0,131941952 |
| 119 | <i>USP46</i>   | -0,22796163  | 0,132044085 |
| 120 | <i>PVRL1</i>   | -0,227934313 | 0,132091675 |
| 121 | <i>BAZ2B</i>   | -0,227180829 | 0,13340944  |
| 122 | <i>RASSF8</i>  | -0,226809072 | 0,134063208 |
| 123 | <i>AMFR</i>    | -0,224883059 | 0,137488589 |
| 124 | <i>RNF38</i>   | -0,223512302 | 0,139965813 |
| 125 | <i>SRSF2</i>   | -0,223055271 | 0,140799077 |
| 126 | <i>PTGDR</i>   | -0,223016511 | 0,140869913 |
| 127 | <i>MR1</i>     | -0,22277152  | 0,141318261 |
| 128 | <i>TWISTNB</i> | -0,222322739 | 0,142142299 |
| 129 | <i>ASAP1</i>   | -0,222140872 | 0,14247725  |
| 130 | <i>BASP1</i>   | -0,221966234 | 0,142799437 |
| 131 | <i>NKAP</i>    | -0,22151731  | 0,143630122 |
| 132 | <i>SCD</i>     | -0,220770283 | 0,145020332 |
| 133 | <i>FOSB</i>    | -0,218906001 | 0,148533069 |
| 134 | <i>PRDM1</i>   | -0,217370981 | 0,15147213  |
| 135 | <i>REV1</i>    | -0,216856183 | 0,152467304 |
| 136 | <i>KCNA2</i>   | -0,21669038  | 0,152788843 |
| 137 | <i>SLC6A6</i>  | -0,215784674 | 0,154554051 |
| 138 | <i>ZDHHC20</i> | -0,215617325 | 0,154881842 |
| 139 | <i>ZBTB20</i>  | -0,214042687 | 0,157991092 |
| 140 | <i>NRIP1</i>   | -0,213682426 | 0,158708821 |
| 141 | <i>CADM1</i>   | -0,213612434 | 0,15884854  |
| 142 | <i>GMFB</i>    | -0,213227781 | 0,159617983 |
| 143 | <i>SLC30A4</i> | -0,212442798 | 0,161196657 |
| 144 | <i>YIPF5</i>   | -0,212344776 | 0,161394584 |
| 145 | <i>CHSY1</i>   | -0,211410136 | 0,163290721 |
| 146 | <i>KDR</i>     | -0,210565963 | 0,165017204 |
| 147 | <i>EIF4E3</i>  | -0,209987444 | 0,166208005 |
| 148 | <i>CDC73</i>   | -0,209790143 | 0,166615545 |
| 149 | <i>EIF4E</i>   | -0,209405581 | 0,167411966 |
| 150 | <i>FXR1</i>    | -0,20929857  | 0,167634075 |
| 151 | <i>STYX</i>    | -0,209213694 | 0,167810391 |
| 152 | <i>FYN</i>     | -0,208974704 | 0,168307578 |
| 153 | <i>PIGA</i>    | -0,208488292 | 0,169322786 |
| 154 | <i>ZEB1</i>    | -0,208406995 | 0,169492896 |
| 155 | <i>SPRYD7</i>  | -0,206396256 | 0,173739665 |
| 156 | <i>SIAH1</i>   | -0,204434518 | 0,177956328 |
| 157 | <i>SMARCD1</i> | -0,203357882 | 0,180301491 |
| 158 | <i>BNIP3L</i>  | -0,202778302 | 0,181573082 |



|     |                    |              |             |
|-----|--------------------|--------------|-------------|
| 159 | <i>PALM2-AKAP2</i> | -0,202043967 | 0,183193406 |
| 160 | <i>RIMS3</i>       | -0,201533193 | 0,184326513 |
| 161 | <i>SETD7</i>       | -0,200136217 | 0,187451127 |
| 162 | <i>ZDHHHC17</i>    | -0,199301893 | 0,189335152 |
| 163 | <i>VTI1A</i>       | -0,196306145 | 0,196210851 |
| 164 | <i>EFNA5</i>       | -0,195879126 | 0,197205109 |
| 165 | <i>RFX7</i>        | -0,194182561 | 0,20119047  |
| 166 | <i>KLF12</i>       | -0,193597716 | 0,202577358 |
| 167 | <i>STX12</i>       | -0,193453007 | 0,202921551 |
| 168 | <i>ATP2A2</i>      | -0,191953024 | 0,206513521 |
| 169 | <i>DNAJC3</i>      | -0,191008868 | 0,20879717  |
| 170 | <i>TCEB1</i>       | -0,190773169 | 0,209370002 |
| 171 | <i>CALU</i>        | -0,190118853 | 0,210965976 |
| 172 | <i>C16orf72</i>    | -0,190003882 | 0,211247282 |
| 173 | <i>RHOA</i>        | -0,188981693 | 0,213759829 |
| 174 | <i>FOXK1</i>       | -0,186196322 | 0,220711597 |
| 175 | <i>THRA</i>        | -0,185565793 | 0,222306739 |
| 176 | <i>CTNND2</i>      | -0,185190829 | 0,223259107 |
| 177 | <i>PPP4R2</i>      | -0,183195442 | 0,22837452  |
| 178 | <i>ERRFI1</i>      | -0,182736038 | 0,229563568 |
| 179 | <i>CDHR1</i>       | -0,182418859 | 0,230386978 |
| 180 | <i>JAZF1</i>       | -0,182232807 | 0,230870917 |
| 181 | <i>TMEM200C</i>    | -0,181450221 | 0,232914132 |
| 182 | <i>BACH2</i>       | -0,180604361 | 0,235136416 |
| 183 | <i>NAPB</i>        | -0,178425983 | 0,240926071 |
| 184 | <i>SHC1</i>        | -0,177880137 | 0,242391855 |
| 185 | <i>NR3C1</i>       | -0,177523563 | 0,243352637 |
| 186 | <i>JAKMIP2</i>     | -0,175152815 | 0,249806193 |
| 187 | <i>BBX</i>         | -0,175087084 | 0,249986749 |
| 188 | <i>MXD3</i>        | -0,17484111  | 0,250663202 |
| 189 | <i>KATNAL1</i>     | -0,174418197 | 0,251829129 |
| 190 | <i>FBXO30</i>      | -0,174370461 | 0,251960961 |
| 191 | <i>DCAF5</i>       | -0,174329126 | 0,252075155 |
| 192 | <i>SYNCRIP</i>     | -0,174203771 | 0,252421671 |
| 193 | <i>PPP2CA</i>      | -0,173956795 | 0,253105324 |
| 194 | <i>CELF2</i>       | -0,173906971 | 0,25324339  |
| 195 | <i>AVL9</i>        | -0,173230794 | 0,255122156 |
| 196 | <i>ZNF597</i>      | -0,17322593  | 0,255135705 |
| 197 | <i>DAG1</i>        | -0,17257531  | 0,256952327 |
| 198 | <i>FBXO42</i>      | -0,171577673 | 0,259754655 |
| 199 | <i>PDIK1L</i>      | -0,171571713 | 0,259771456 |
| 200 | <i>DENND2C</i>     | -0,171420981 | 0,260196645 |
| 201 | <i>MMGT1</i>       | -0,171380263 | 0,260311581 |
| 202 | <i>CFL2</i>        | -0,171266367 | 0,260633265 |
| 203 | <i>DACH1</i>       | -0,170232588 | 0,263565148 |

|     |                 |              |             |
|-----|-----------------|--------------|-------------|
| 204 | <i>NRP2</i>     | -0,169503483 | 0,265646099 |
| 205 | <i>OTUD4</i>    | -0,169032583 | 0,266995887 |
| 206 | <i>PHF12</i>    | -0,168826355 | 0,267588452 |
| 207 | <i>WNK1</i>     | -0,168696352 | 0,267962439 |
| 208 | <i>IL6ST</i>    | -0,167174863 | 0,272365182 |
| 209 | <i>OSBPL11</i>  | -0,166520882 | 0,274272201 |
| 210 | <i>CSNK1G3</i>  | -0,166470065 | 0,274420753 |
| 211 | <i>OSR1</i>     | -0,165522199 | 0,277201315 |
| 212 | <i>NR2C2</i>    | -0,165249976 | 0,278003288 |
| 213 | <i>PSME4</i>    | -0,165057884 | 0,278570114 |
| 214 | <i>CYP1B1</i>   | -0,163461122 | 0,283311172 |
| 215 | <i>TMEM170B</i> | -0,163353052 | 0,283633943 |
| 216 | <i>QKI</i>      | -0,16283369  | 0,285188467 |
| 217 | <i>SLC6A17</i>  | -0,162277071 | 0,286860663 |
| 218 | <i>SLC16A2</i>  | -0,159557202 | 0,295123367 |
| 219 | <i>ZFHX4</i>    | -0,156794239 | 0,303672866 |
| 220 | <i>SYDE1</i>    | -0,155639096 | 0,307293828 |
| 221 | <i>NCOA2</i>    | -0,155270606 | 0,308454688 |
| 222 | <i>RECK</i>     | -0,154777005 | 0,310014066 |
| 223 | <i>LATS2</i>    | -0,153200921 | 0,31502676  |
| 224 | <i>SEC23A</i>   | -0,151446519 | 0,320666662 |
| 225 | <i>WAPAL</i>    | -0,151148506 | 0,321630974 |
| 226 | <i>SMIM13</i>   | -0,150181978 | 0,324771017 |
| 227 | <i>NRXN1</i>    | -0,146296624 | 0,337587056 |
| 228 | <i>FBXL17</i>   | -0,14495647  | 0,342079325 |
| 229 | <i>CBX5</i>     | -0,144874029 | 0,342356869 |
| 230 | <i>TUBB3</i>    | -0,144577015 | 0,343357947 |
| 231 | <i>RIMKLB</i>   | -0,144488921 | 0,343655213 |
| 232 | <i>WIPF1</i>    | -0,144401047 | 0,343951892 |
| 233 | <i>RAP2C</i>    | -0,144290543 | 0,344325198 |
| 234 | <i>DNAJB14</i>  | -0,144110365 | 0,344934415 |
| 235 | <i>CAMK2D</i>   | -0,143845378 | 0,345831594 |
| 236 | <i>CHD2</i>     | -0,142606463 | 0,350045236 |
| 237 | <i>PCDH8</i>    | -0,141914531 | 0,352412158 |
| 238 | <i>NEK10</i>    | -0,140917855 | 0,355838662 |
| 239 | <i>UBE2W</i>    | -0,139855668 | 0,359512614 |
| 240 | <i>HNRNPD</i>   | -0,139304941 | 0,361426514 |
| 241 | <i>PDS5B</i>    | -0,138666028 | 0,363654582 |
| 242 | <i>MYBL1</i>    | -0,137703979 | 0,367025112 |
| 243 | <i>MYT1</i>     | -0,137582815 | 0,367450937 |
| 244 | <i>DDX3Y</i>    | -0,135783501 | 0,37380942  |
| 245 | <i>GOLGA7</i>   | -0,134452523 | 0,378554858 |
| 246 | <i>XRN1</i>     | -0,133108758 | 0,38338199  |
| 247 | <i>TSC22D1</i>  | -0,131683239 | 0,388542345 |
| 248 | <i>EVI5</i>     | -0,131228901 | 0,390195576 |

|     |                 |              |             |
|-----|-----------------|--------------|-------------|
| 249 | <i>CEBPA</i>    | -0,131016646 | 0,390969333 |
| 250 | <i>MAP4K3</i>   | -0,129003926 | 0,3983511   |
| 251 | <i>PIK3CB</i>   | -0,12886189  | 0,398875068 |
| 252 | <i>FAM107B</i>  | -0,128676498 | 0,399559571 |
| 253 | <i>ZNF697</i>   | -0,128029702 | 0,401953009 |
| 254 | <i>DOCK4</i>    | -0,127434259 | 0,404163731 |
| 255 | <i>CHST2</i>    | -0,127267022 | 0,404785901 |
| 256 | <i>CDYL2</i>    | -0,126666957 | 0,407022846 |
| 257 | <i>GABPA</i>    | -0,124616961 | 0,414718365 |
| 258 | <i>RUSC2</i>    | -0,123564953 | 0,418699506 |
| 259 | <i>MAP4K4</i>   | -0,123132034 | 0,420344095 |
| 260 | <i>MYLK</i>     | -0,122765622 | 0,421738888 |
| 261 | <i>MIER3</i>    | -0,122168345 | 0,424018097 |
| 262 | <i>FOXN2</i>    | -0,121378233 | 0,427043815 |
| 263 | <i>AGO2</i>     | -0,120034366 | 0,432217903 |
| 264 | <i>CLIP1</i>    | -0,119642905 | 0,433731646 |
| 265 | <i>RNF2</i>     | -0,118827194 | 0,436895399 |
| 266 | <i>ARL14EPL</i> | -0,11873296  | 0,437261711 |
| 267 | <i>SFXN1</i>    | -0,118710053 | 0,437350784 |
| 268 | <i>MSN</i>      | -0,11783109  | 0,440776139 |
| 269 | <i>GREB1L</i>   | -0,117477555 | 0,442158052 |
| 270 | <i>SPTSSA</i>   | -0,117408565 | 0,442427999 |
| 271 | <i>INHBA</i>    | -0,117150877 | 0,443437106 |
| 272 | <i>PCSK2</i>    | -0,117140382 | 0,443478231 |
| 273 | <i>KDM3B</i>    | -0,116477859 | 0,446078617 |
| 274 | <i>GPC6</i>     | -0,114727661 | 0,452988225 |
| 275 | <i>PPP2R5E</i>  | -0,110896063 | 0,468316458 |
| 276 | <i>HAS2</i>     | -0,110428914 | 0,470204033 |
| 277 | <i>GJC1</i>     | -0,110269034 | 0,470850976 |
| 278 | <i>SCN1A</i>    | -0,10880311  | 0,476804776 |
| 279 | <i>TP53INP1</i> | -0,107296658 | 0,482964359 |
| 280 | <i>FMR1</i>     | -0,10661348  | 0,485771415 |
| 281 | <i>KIAA0087</i> | -0,105888836 | 0,488758126 |
| 282 | <i>CEP41</i>    | -0,1054455   | 0,490590086 |
| 283 | <i>ZBTB16</i>   | -0,104670887 | 0,49379948  |
| 284 | <i>ZC3H6</i>    | -0,103767033 | 0,497558006 |
| 285 | <i>DPYSL2</i>   | -0,103487218 | 0,498724537 |
| 286 | <i>TRIM33</i>   | -0,101808902 | 0,505750672 |
| 287 | <i>TRERF1</i>   | -0,101749538 | 0,506000113 |
| 288 | <i>NUP153</i>   | -0,100914996 | 0,509513339 |
| 289 | <i>SCAMP1</i>   | -0,098757477 | 0,518652743 |
| 290 | <i>GATA2</i>    | -0,097984568 | 0,521946601 |
| 291 | <i>CREBBP</i>   | -0,096077172 | 0,530119374 |
| 292 | <i>MED1</i>     | -0,09376519  | 0,540109047 |
| 293 | <i>FAM60A</i>   | -0,093270133 | 0,54225985  |

|     |                 |              |             |
|-----|-----------------|--------------|-------------|
| 294 | <i>NALCN</i>    | -0,092575315 | 0,545285453 |
| 295 | <i>NUDT4</i>    | -0,092108814 | 0,54732137  |
| 296 | <i>HIPK1</i>    | -0,0893032   | 0,559641633 |
| 297 | <i>BRWD1</i>    | -0,088799581 | 0,561866828 |
| 298 | <i>AFF1</i>     | -0,08545589  | 0,576744218 |
| 299 | <i>GAD2</i>     | -0,085364262 | 0,577154417 |
| 300 | <i>CGGBP1</i>   | -0,08444694  | 0,581268348 |
| 301 | <i>GRIN2A</i>   | -0,084401026 | 0,581474606 |
| 302 | <i>CSNK1G1</i>  | -0,08434164  | 0,581741431 |
| 303 | <i>NCS1</i>     | -0,083828862 | 0,584047692 |
| 304 | <i>SERPINC1</i> | -0,083373336 | 0,586099888 |
| 305 | <i>UBE2I</i>    | -0,083345771 | 0,586224177 |
| 306 | <i>GNAI3</i>    | -0,082586267 | 0,589653313 |
| 307 | <i>ZFAND5</i>   | -0,082046004 | 0,592097995 |
| 308 | <i>SH3GL1</i>   | -0,081617163 | 0,594041688 |
| 309 | <i>FOXP1</i>    | -0,080558473 | 0,598852125 |
| 310 | <i>CLIC4</i>    | -0,079740936 | 0,602578441 |
| 311 | <i>ANKRD40</i>  | -0,079730484 | 0,602626145 |
| 312 | <i>DENND5A</i>  | -0,077573982 | 0,612503711 |
| 313 | <i>MPRIIP</i>   | -0,076969558 | 0,615284527 |
| 314 | <i>FBXL16</i>   | -0,075939263 | 0,620036975 |
| 315 | <i>PRKACB</i>   | -0,075507398 | 0,622033617 |
| 316 | <i>TMEM164</i>  | -0,075126558 | 0,623796582 |
| 317 | <i>DNAJC5</i>   | -0,074649971 | 0,626005709 |
| 318 | <i>MXD4</i>     | -0,074261214 | 0,627810121 |
| 319 | <i>PLCL1</i>    | -0,073501484 | 0,631342588 |
| 320 | <i>SESN1</i>    | -0,073311154 | 0,632228834 |
| 321 | <i>REEP1</i>    | -0,072424055 | 0,636366191 |
| 322 | <i>CSRNP3</i>   | -0,072401549 | 0,636471301 |
| 323 | <i>MAP2</i>     | -0,071800924 | 0,639278989 |
| 324 | <i>AMBRA1</i>   | -0,070725252 | 0,644319795 |
| 325 | <i>LCOR</i>     | -0,06930451  | 0,651001891 |
| 326 | <i>CKAP4</i>    | -0,06924842  | 0,651266256 |
| 327 | <i>FOXG1</i>    | -0,069002414 | 0,652426242 |
| 328 | <i>SPATS2L</i>  | -0,068787548 | 0,653440055 |
| 329 | <i>PTBP1</i>    | -0,068105041 | 0,65666445  |
| 330 | <i>ELAVL4</i>   | -0,06706533  | 0,661588265 |
| 331 | <i>MBOAT2</i>   | -0,06702696  | 0,661770248 |
| 332 | <i>LHX5</i>     | -0,06544345  | 0,669297289 |
| 333 | <i>BMI1</i>     | -0,062272192 | 0,68446764  |
| 334 | <i>KIF26B</i>   | -0,061696298 | 0,687235981 |
| 335 | <i>ZNF131</i>   | -0,061085136 | 0,690178291 |
| 336 | <i>ABAT</i>     | -0,061037696 | 0,690406871 |
| 337 | <i>C16orf52</i> | -0,060462458 | 0,693180695 |
| 338 | <i>WASF1</i>    | -0,059057568 | 0,699971773 |

|     |                    |              |             |
|-----|--------------------|--------------|-------------|
| 339 | <i>NPTX1</i>       | -0,057512995 | 0,707464842 |
| 340 | <i>PHTF2</i>       | -0,056539185 | 0,712203155 |
| 341 | <i>ETS2</i>        | -0,05592795  | 0,715182763 |
| 342 | <i>LHX9</i>        | -0,055695134 | 0,716318786 |
| 343 | <i>MED13</i>       | -0,055182976 | 0,718819982 |
| 344 | <i>SIX1</i>        | -0,054749053 | 0,720941385 |
| 345 | <i>PHACTR3</i>     | -0,054711331 | 0,721125902 |
| 346 | <i>CNOT6</i>       | -0,054422806 | 0,722537737 |
| 347 | <i>PKIA</i>        | -0,054188307 | 0,723685881 |
| 348 | <i>AGFG1</i>       | -0,054182794 | 0,723712878 |
| 349 | <i>EGR3</i>        | -0,053109197 | 0,728977065 |
| 350 | <i>SCHIP1</i>      | -0,052990241 | 0,729561106 |
| 351 | <i>RBFOX2</i>      | -0,052825524 | 0,730370073 |
| 352 | <i>VCPIP1</i>      | -0,052385867 | 0,73253076  |
| 353 | <i>CNEP1R1</i>     | -0,052297657 | 0,732964512 |
| 354 | <i>FEM1C</i>       | -0,051261858 | 0,738063945 |
| 355 | <i>PPP1R18</i>     | -0,050812443 | 0,740279978 |
| 356 | <i>PFDN4</i>       | -0,048887987 | 0,749792661 |
| 357 | <i>NPC1</i>        | -0,048536394 | 0,751534624 |
| 358 | <i>SLC6A15</i>     | -0,048181163 | 0,753295851 |
| 359 | <i>IQCJ-SCHIP1</i> | -0,048112281 | 0,753637512 |
| 360 | <i>CASR</i>        | -0,048031173 | 0,754039873 |
| 361 | <i>XPR1</i>        | -0,047945747 | 0,754463726 |
| 362 | <i>RIMS2</i>       | -0,047714099 | 0,75561343  |
| 363 | <i>PAPD5</i>       | -0,047664474 | 0,755859798 |
| 364 | <i>AFF4</i>        | -0,046007279 | 0,764100613 |
| 365 | <i>LRP1B</i>       | -0,040867206 | 0,789821534 |
| 366 | <i>CNOT4</i>       | -0,040732592 | 0,790498252 |
| 367 | <i>SULF1</i>       | -0,040154138 | 0,793407922 |
| 368 | <i>PTCD1</i>       | -0,040132863 | 0,793514993 |
| 369 | <i>APOO</i>        | -0,039062741 | 0,79890527  |
| 370 | <i>SCN2A</i>       | -0,038681076 | 0,800829996 |
| 371 | <i>RSRC2</i>       | -0,038558554 | 0,80144812  |
| 372 | <i>SMAD7</i>       | -0,035722057 | 0,815791014 |
| 373 | <i>FIGN</i>        | -0,035697482 | 0,815915547 |
| 374 | <i>TMEM135</i>     | -0,03530021  | 0,817929322 |
| 375 | <i>NXPH1</i>       | -0,035125173 | 0,818816955 |
| 376 | <i>KLF10</i>       | -0,034138549 | 0,823824403 |
| 377 | <i>ADAMTS8</i>     | -0,034061657 | 0,824214949 |
| 378 | <i>CLASP1</i>      | -0,032748188 | 0,83089266  |
| 379 | <i>ADCY2</i>       | -0,031218345 | 0,838685273 |
| 380 | <i>KRAS</i>        | -0,029947255 | 0,845171523 |
| 381 | <i>PLXNA4</i>      | -0,029691017 | 0,84648032  |
| 382 | <i>BAP1</i>        | -0,029620801 | 0,846839036 |
| 383 | <i>FGD1</i>        | -0,028419889 | 0,852978901 |

|     |                   |              |             |
|-----|-------------------|--------------|-------------|
| 384 | <i>YPEL2</i>      | -0,027254777 | 0,858943956 |
| 385 | <i>MDFIC</i>      | -0,026627288 | 0,86215977  |
| 386 | <i>ARIH1</i>      | -0,026111169 | 0,864806482 |
| 387 | <i>TUBB</i>       | -0,025723137 | 0,866797312 |
| 388 | <i>DLC1</i>       | -0,025493178 | 0,867977522 |
| 389 | <i>SMARCAD1</i>   | -0,025103029 | 0,869980521 |
| 390 | <i>SPAG9</i>      | -0,024946193 | 0,870785931 |
| 391 | <i>ZC3HAV1L</i>   | -0,024714049 | 0,871978314 |
| 392 | <i>RLF</i>        | -0,023835615 | 0,876492822 |
| 393 | <i>MMD</i>        | -0,023123746 | 0,880154161 |
| 394 | <i>IAH1</i>       | -0,022690083 | 0,882385823 |
| 395 | <i>LCA5</i>       | -0,022287209 | 0,884459855 |
| 396 | <i>SCN5A</i>      | -0,020342121 | 0,894483838 |
| 397 | <i>CRKL</i>       | -0,019200907 | 0,900372744 |
| 398 | <i>RBM20</i>      | -0,018066842 | 0,906230009 |
| 399 | <i>HIVEP3</i>     | -0,017261357 | 0,910393218 |
| 400 | <i>SLC24A4</i>    | -0,016690402 | 0,913345684 |
| 401 | <i>NDN</i>        | -0,015375215 | 0,92015098  |
| 402 | <i>AKT2</i>       | -0,013890183 | 0,927841879 |
| 403 | <i>MFHAS1</i>     | -0,013743257 | 0,928603167 |
| 404 | <i>FBXW7</i>      | -0,013375707 | 0,930507876 |
| 405 | <i>ST6GALNAC5</i> | -0,01306682  | 0,932108883 |
| 406 | <i>TBC1D22B</i>   | -0,012244754 | 0,936371042 |
| 407 | <i>ZBTB38</i>     | -0,012107148 | 0,937084659 |
| 408 | <i>CNTN4</i>      | -0,011602294 | 0,939703231 |
| 409 | <i>CACNA1C</i>    | -0,011391519 | 0,940796661 |
| 410 | <i>ZC3H15</i>     | -0,011214429 | 0,94171543  |
| 411 | <i>YWHAB</i>      | -0,011113665 | 0,94223824  |
| 412 | <i>GIT2</i>       | -0,010663971 | 0,944571755 |
| 413 | <i>PIP4K2B</i>    | -0,010424122 | 0,945816551 |
| 414 | <i>KLF4</i>       | -0,009569089 | 0,950255113 |
| 415 | <i>MAFG</i>       | -0,009433992 | 0,950956553 |
| 416 | <i>GPR173</i>     | -0,009097981 | 0,952701323 |
| 417 | <i>AMOTL2</i>     | -0,007740085 | 0,959754482 |
| 418 | <i>ELF2</i>       | -0,00772278  | 0,959844388 |
| 419 | <i>KMT2C</i>      | -0,004934761 | 0,974334872 |
| 420 | <i>PTHLH</i>      | -0,004006812 | 0,979159849 |
| 421 | <i>JUN</i>        | -0,00376711  | 0,980406335 |
| 422 | <i>DUSP1</i>      | -0,003093807 | 0,983907839 |
| 423 | <i>ARHGDIA</i>    | -0,001411984 | 0,992655312 |
| 424 | <i>SUV420H1</i>   | -0,001391473 | 0,992761999 |
| 425 | <i>HSPE1-MOB4</i> | -0,000510947 | 0,997342187 |
| 426 | <i>RAB13</i>      | -0,000293638 | 0,998472568 |

**Supplementary Table 3.** Regression model details.

| JAZF1 ~ Gender + Age + Condition |           |            |         |         |                |
|----------------------------------|-----------|------------|---------|---------|----------------|
|                                  | Estimate  | Std. Error | t value | P-value |                |
| (Intercept)                      | 5.319506  | 0.195810   | 27.167  | <2e-16  | ***            |
| GenderMale                       | 0.047694  | 0.065996   | 0.723   | 0.4708  |                |
| Age                              | 0.002702  | 0.003241   | 0.834   | 0.4056  |                |
| ConditionIGT                     | -0.135953 | 0.085678   | -1.587  | 0.1143  |                |
| ConditionT2D                     | -0.162535 | 0.086958   | -1.869  | 0.0632  | . (Fig 2B - 1) |

| ETV5 ~ Gender + Age + Condition |           |            |         |          |                |
|---------------------------------|-----------|------------|---------|----------|----------------|
|                                 | Estimate  | Std. Error | t value | P-value  |                |
| (Intercept)                     | 4.295774  | 0.156751   | 27.405  | < 2e-16  | ***            |
| GenderMale                      | 0.224886  | 0.052831   | 4.257   | 3.33e-05 | *** (Fig 2C)   |
| Age                             | 0.006322  | 0.002595   | 2.437   | 0.0158   | *              |
| ConditionIGT                    | -0.079105 | 0.068588   | -1.153  | 0.2503   |                |
| ConditionT2D                    | -0.170082 | 0.069613   | -2.443  | 0.0155   | * (Fig 2B - 3) |

| SNX30 ~ Gender + Age + Condition |           |            |         |         |                 |
|----------------------------------|-----------|------------|---------|---------|-----------------|
|                                  | Estimate  | Std. Error | t value | P-value |                 |
| (Intercept)                      | 4.704908  | 0.201796   | 23.315  | < 2e-16 | ***             |
| GenderMale                       | 0.098597  | 0.068013   | 1.450   | 0.14889 |                 |
| Age                              | 0.007156  | 0.003340   | 2.142   | 0.03352 | *               |
| ConditionIGT                     | -0.157020 | 0.088298   | -1.778  | 0.07704 | .               |
| ConditionT2D                     | -0.272311 | 0.089617   | -3.039  | 0.00273 | ** (Fig 2B - 2) |

**Supplementary Table 4.** Analysis of differentially expressed genes after ETV5 knockdown (siETV5) in human islets (N=4 donors).

Genes are sorted based on the adjusted p-value in ascending order.

| Ensembl Gene ID | Gene Name | log2FoldChange | padj        | Gene Description                                                                        |
|-----------------|-----------|----------------|-------------|-----------------------------------------------------------------------------------------|
| ENSG00000165272 | AQP3      | -0,84407012    | 2,28577E-15 | aquaporin 3 (Gill blood group) [Source:HGNC Symbol;Acc:HGNC:636]                        |
| ENSG00000170345 | FOS       | -0,547036135   | 4,08947E-05 | Fos proto-oncogene AP-1 transcription factor subunit [Source:HGNC Symbol;Acc:HGNC:3796] |
| ENSG00000116237 | ICMT      | -0,381761384   | 0,000315982 | isoprenylcysteine carboxyl methyltransferase [Source:HGNC Symbol;Acc:HGNC:5350]         |
| ENSG00000117899 | MESD      | -0,421109924   | 0,0013311   | mesoderm development LRP chaperone [Source:HGNC Symbol;Acc:HGNC:13520]                  |
| ENSG00000067955 | CBFB      | -0,415422058   | 0,0013311   | core-binding factor subunit beta [Source:HGNC Symbol;Acc:HGNC:1539]                     |
| ENSG00000150961 | SEC24D    | -0,299761373   | 0,0013311   | SEC24 homolog D COPII coat complex component [Source:HGNC Symbol;Acc:HGNC:10706]        |
| ENSG00000105220 | GPI       | 0,35127152     | 0,001476019 | glucose-6-phosphate isomerase [Source:HGNC Symbol;Acc:HGNC:4458]                        |
| ENSG00000166265 | CYYR1     | -0,611651067   | 0,002416749 | cysteine and tyrosine rich 1 [Source:HGNC Symbol;Acc:HGNC:16274]                        |



|                 |            |              |             |                                                                                                                 |
|-----------------|------------|--------------|-------------|-----------------------------------------------------------------------------------------------------------------|
| ENSG00000138029 | HADHB      | -0,30360527  | 0,002432679 | hydroxyacyl-CoA dehydrogenase trifunctional multienzyme complex subunit beta [Source:HGNC Symbol;Acc:HGNC:4803] |
| ENSG00000183458 | AC138932.1 | 0,574908789  | 0,003268826 | polycystic kidney disease 1 (autosomal dominant) (PKD1) pseudogene                                              |
| ENSG00000159388 | BTG2       | -0,383945882 | 0,003268826 | BTG anti-proliferation factor 2 [Source:HGNC Symbol;Acc:HGNC:1131]                                              |
| ENSG00000198682 | PAPSS2     | -0,251746375 | 0,003268826 | 3'-phosphoadenosine 5'-phosphosulfate synthase 2 [Source:HGNC Symbol;Acc:HGNC:8604]                             |
| ENSG00000184203 | PPP1R2     | -0,292700186 | 0,004201327 | protein phosphatase 1 regulatory inhibitor subunit 2 [Source:HGNC Symbol;Acc:HGNC:9288]                         |
| ENSG00000169926 | KLF13      | 0,39934699   | 0,004797034 | Kruppel like factor 13 [Source:HGNC Symbol;Acc:HGNC:13672]                                                      |
| ENSG00000164023 | SGMS2      | -0,350325503 | 0,005087572 | sphingomyelin synthase 2 [Source:HGNC Symbol;Acc:HGNC:28395]                                                    |
| ENSG00000140992 | PDPK1      | 0,350890529  | 0,005710493 | 3-phosphoinositide dependent protein kinase 1 [Source:HGNC Symbol;Acc:HGNC:8816]                                |
| ENSG00000105287 | PRKD2      | 0,700392965  | 0,006655541 | protein kinase D2 [Source:HGNC Symbol;Acc:HGNC:17293]                                                           |
| ENSG00000114315 | HES1       | -0,416884025 | 0,006655541 | hes family bHLH transcription factor 1 [Source:HGNC Symbol;Acc:HGNC:5192]                                       |
| ENSG00000144597 | EAF1       | -0,340560973 | 0,006655541 | ELL associated factor 1 [Source:HGNC Symbol;Acc:HGNC:20907]                                                     |
| ENSG00000149654 | CDH22      | 0,521304474  | 0,015717833 | cadherin 22 [Source:HGNC Symbol;Acc:HGNC:13251]                                                                 |
| ENSG00000135250 | SRPK2      | 0,381506004  | 0,015717833 | SRSF protein kinase 2 [Source:HGNC Symbol;Acc:HGNC:11306]                                                       |
| ENSG00000151135 | TMEM263    | -0,315333595 | 0,018759369 | transmembrane protein 263 [Source:HGNC Symbol;Acc:HGNC:28281]                                                   |
| ENSG00000171564 | FGB        | -0,488200147 | 0,02446076  | fibrinogen beta chain [Source:HGNC Symbol;Acc:HGNC:3662]                                                        |
| ENSG00000162873 | KLHDC8A    | -0,4739101   | 0,026582486 | kelch domain containing 8A [Source:HGNC Symbol;Acc:HGNC:25573]                                                  |
| ENSG00000110060 | PUS3       | -0,478281016 | 0,026997331 | pseudouridine synthase 3 [Source:HGNC Symbol;Acc:HGNC:25461]                                                    |
| ENSG00000137942 | FNBP1L     | -0,273767052 | 0,034127156 | formin binding protein 1 like [Source:HGNC Symbol;Acc:HGNC:20851]                                               |
| ENSG00000244405 | ETV5       | -0,513534064 | 0,044566135 | ETS variant transcription factor 5 [Source:HGNC Symbol;Acc:HGNC:3494]                                           |
| ENSG00000072506 | HSD17B10   | -0,408186665 | 0,044566135 | hydroxysteroid 17-beta dehydrogenase 10 [Source:HGNC Symbol;Acc:HGNC:4800]                                      |
| ENSG00000139438 | FAM222A    | 0,308562037  | 0,044566135 | family with sequence similarity 222 member A [Source:HGNC Symbol;Acc:HGNC:25915]                                |
| ENSG00000140612 | SEC11A     | -0,258233101 | 0,044566135 | SEC11 homolog A signal peptidase complex subunit [Source:HGNC Symbol;Acc:HGNC:17718]                            |
| ENSG00000074370 | ATP2A3     | 0,211540898  | 0,052301212 | ATPase sarcoplasmic/endoplasmic reticulum Ca2+ transporting 3 [Source:HGNC Symbol;Acc:HGNC:813]                 |
| ENSG00000105357 | MYH14      | 0,249544585  | 0,052718566 | myosin heavy chain 14 [Source:HGNC Symbol;Acc:HGNC:23212]                                                       |
| ENSG00000182952 | HMGN4      | -0,373296955 | 0,058973762 | high mobility group nucleosomal binding domain 4 [Source:HGNC Symbol;Acc:HGNC:4989]                             |
| ENSG00000143952 | VPS54      | -0,259556258 | 0,058973762 | VPS54 subunit of GARP complex [Source:HGNC Symbol;Acc:HGNC:18652]                                               |



|                 |          |              |             |                                                                                                                                         |
|-----------------|----------|--------------|-------------|-----------------------------------------------------------------------------------------------------------------------------------------|
| ENSG00000139364 | TMEM132B | 0,531795304  | 0,084864881 | transmembrane protein 132B [Source:HGNC Symbol;Acc:HGNC:29397]                                                                          |
| ENSG00000266714 | MYO15B   | 0,479109302  | 0,084864881 | myosin XVB [Source:HGNC Symbol;Acc:HGNC:14083]                                                                                          |
| ENSG00000198535 | C2CD4A   | -0,386871132 | 0,084864881 | C2 calcium dependent domain containing 4A [Source:HGNC Symbol;Acc:HGNC:33627]                                                           |
| ENSG00000149527 | PLCH2    | 0,36166687   | 0,084864881 | phospholipase C eta 2 [Source:HGNC Symbol;Acc:HGNC:29037]                                                                               |
| ENSG00000039068 | CDH1     | -0,18670402  | 0,084864881 | cadherin 1 [Source:HGNC Symbol;Acc:HGNC:1748]                                                                                           |
| ENSG00000125968 | ID1      | -0,284429389 | 0,087784112 | inhibitor of DNA binding 1 HLH protein [Source:HGNC Symbol;Acc:HGNC:5360]                                                               |
| ENSG00000104419 | NDRG1    | 0,381104626  | 0,089197771 | N-myc downstream regulated 1 [Source:HGNC Symbol;Acc:HGNC:7679]                                                                         |
| ENSG00000111799 | COL12A1  | -0,358905607 | 0,089197771 | collagen type XII alpha 1 chain [Source:HGNC Symbol;Acc:HGNC:2188]                                                                      |
| ENSG00000128050 | PAICS    | 0,305022253  | 0,089197771 | phosphoribosylaminoimidazole carboxylase and phosphoribosylaminoimidazolesuccinocarboxamide synthase [Source:HGNC Symbol;Acc:HGNC:8587] |
| ENSG00000134333 | LDHA     | 0,340549744  | 0,091148856 | lactate dehydrogenase A [Source:HGNC Symbol;Acc:HGNC:6535]                                                                              |
| ENSG00000169710 | FASN     | -0,560872292 | 0,091350417 | fatty acid synthase [Source:HGNC Symbol;Acc:HGNC:3594]                                                                                  |
| ENSG00000160360 | GPSM1    | 0,415137817  | 0,094469082 | G protein signaling modulator 1 [Source:HGNC Symbol;Acc:HGNC:17858]                                                                     |
| ENSG00000176840 | MIR7-3HG | -0,311248048 | 0,094469082 | MIR7-3 host gene [Source:HGNC Symbol;Acc:HGNC:30049]                                                                                    |
| ENSG00000108828 | VAT1     | 0,278611812  | 0,094469082 | vesicle amine transport 1 [Source:HGNC Symbol;Acc:HGNC:16919]                                                                           |
| ENSG00000072803 | FBXW11   | -0,247590533 | 0,094469082 | F-box and WD repeat domain containing 11 [Source:HGNC Symbol;Acc:HGNC:13607]                                                            |
| ENSG00000112715 | VEGFA    | 0,237853282  | 0,094469082 | vascular endothelial growth factor A [Source:HGNC Symbol;Acc:HGNC:12680]                                                                |
| ENSG00000077264 | PAK3     | -0,230811732 | 0,094469082 | p21 (RAC1) activated kinase 3 [Source:HGNC Symbol;Acc:HGNC:8592]                                                                        |
| ENSG00000236824 | BCYRN1   | -0,442926612 | 0,0947316   | brain cytoplasmic RNA 1 [Source:HGNC Symbol;Acc:HGNC:1022]                                                                              |
| ENSG00000139641 | ESYT1    | -0,213017417 | 0,095040485 | extended synaptotagmin 1 [Source:HGNC Symbol;Acc:HGNC:29534]                                                                            |
| ENSG00000122861 | PLAU     | -0,421782205 | 0,099735564 | plasminogen activator urokinase [Source:HGNC Symbol;Acc:HGNC:9052]                                                                      |
| ENSG00000145888 | GLRA1    | 0,414226429  | 0,099735564 | glycine receptor alpha 1 [Source:HGNC Symbol;Acc:HGNC:4326]                                                                             |
| ENSG00000129757 | CDKN1C   | 0,367258612  | 0,099735564 | cyclin dependent kinase inhibitor 1C [Source:HGNC Symbol;Acc:HGNC:1786]                                                                 |
| ENSG00000172466 | ZNF24    | -0,207173696 | 0,099735564 | zinc finger protein 24 [Source:HGNC Symbol;Acc:HGNC:13032]                                                                              |
